# Supplementary material for: Calvarial osteoblast gene expression in patients with craniosynostosis leads to novel polygenic mouse model
Source: PubMed Central journal article supplement (PMC6707563; doi:10.1371/journal.pone.0221402), 2019-08-23
Supplement: pone.0221402.s002.pdf [file pone.0221402.s002.pdf]

**Supplemental Table 1. Alphabetical list of genes analyzed from cDNA microarray for this study**

| Gene Name | Gene Name | Gene Name | Gene Name | Gene Name | Gene Name | Gene Name | Gene Name |         |          |        |          |       |           |       |        |       |      |
|-----------|-----------|-----------|-----------|-----------|-----------|-----------|-----------|---------|----------|--------|----------|-------|-----------|-------|--------|-------|------|
| ACAN      | CDH6      | EFNA4     | FGF9      | ¥\$↑      | ID4       | ¥\$↑      | KRT15     | ¥\$↓    |          |        |          |       |           |       |        |       |      |
| ACTG2     | CDKN1A    | EFNA5     | FGFBP1    | ¥\$↑      | IGF1      | ¥\$↑      | LAMA1     | ¥\$↓    |          |        |          |       |           |       |        |       |      |
| ACTN4     | ¥\$↓      | CDKN1B    | EFNB1     | FGFBP2    | IGF1R     | ¥↑        | LAMA2     | ¥\$↑    |          |        |          |       |           |       |        |       |      |
| ACVR1     | ¥\$↑      | CDKN1C    | ¥\$↑      | EFNB2     | FGFBP3    | IGF2      | ¥\$↑      | LAMA4   | ¥\$↑     |        |          |       |           |       |        |       |      |
| ACVRL1    | ¥↓        | CDKN2A    | EFNB3     | FGFR1     | IGF2AS    | LAMA5     | ¥\$↑      | RARRES1 | ¥\$↑     |        |          |       |           |       |        |       |      |
| AEBP1     | CDKN2B    | EGF       | FGFR1OP   | IGF2BP1   | ¥↓        | LAMC2     | ¥\$↓      | RARRES2 | ¥\$↑     |        |          |       |           |       |        |       |      |
| AFF2      | ¥\$↑      | CDKN2C    | EGFR      | ¥\$↑      | IGF2BP2   | ¥\$↑      | LEF1      | ¥\$↓    | RARRES3  | ¥\$↑   |          |       |           |       |        |       |      |
| AHSG      | CDKN2D    | EGR3      | FGFR2     | ¥\$↑      | IGF2BP3   | ¥↓        | LEP       | ¥\$↓    | REL      | ¥\$↑   |          |       |           |       |        |       |      |
| ALDH1A3   | CDKN3     | ¥\$↓      | ENAM      | FGFR3     | ¥↑        | IGF2R     | ¥\$↑      | LEPR    | ¥\$↑     | RELA   | ¥\$↓     |       |           |       |        |       |      |
| ALPL      | CHI3L1    | ENPP2     | ¥\$↑      | FGFR4     | IGFALS    | LGALS3    | ¥\$↓      | LEP     | ¥\$↓     | RELB   | ¥\$↓     |       |           |       |        |       |      |
| ALX1      | ¥↓        | cdn1      | ¥\$↑      | EPHA1     | FGFRL1    | ¥\$↑      | IGFBP1    | ¥\$↓    | LGALS3BP | ¥\$↓   | RGS12    | ¥\$↓  |           |       |        |       |      |
| AMBN      | CNTNAP3   | EPHA10    | FGL2      | ¥\$↑      | IGFBP2    | LOXL4     | ¥\$↓      | RUNX1   | ¥\$↑     | THBS2  | ¥\$↑     |       |           |       |        |       |      |
| AMELY     | COL10A1   | EPHA2     | ¥\$↓      | FLNC      | ¥\$↓      | IGFBP3    | LPPR4     | ¥\$↑    | RUNX1T1  | ¥\$↑   | THRA     | ¥\$↑  |           |       |        |       |      |
| ANXA5     | COL11A1   | EPHA3     | ¥\$↑      | FLT1      | IGFBP4    | ¥\$↑      | LRP1      | ¥\$↑    | RUNX2    | ¥\$↑   | THRAP3   | ¥\$↑  |           |       |        |       |      |
| BGLAP     | ¥\$↓      | COL12A1   | ¥\$↑      | EPHA4     | ¥\$↑      | FN1       | ¥\$↓      | LUZP2   | ¥\$↑     | RUNX3  | ¥\$↑     | THRB  | ¥\$↑      |       |        |       |      |
| BGN       | COL14A1   | ¥\$↑      | EPHA5     | FOXC1     | ¥\$↑      | IGFBP5    | ¥\$↑      | MCAM    | S100A4   | THRSP  | ¥\$↓     |       |           |       |        |       |      |
| BMP1      | COL15A1   | EPHA6     | FOXE1     | IGFBP6    | ¥\$↓      | IGFBP7    | ¥\$↓      | MINPP1  | ¥\$↓     | SCARB1 | TINAGL1  | ¥\$↓  |           |       |        |       |      |
| BMP10     | COL1A1    | ¥\$↑      | EPHA7     | FOXF1     | IGFBPL1   | INSR      | ¥\$↑      | MME     | ¥\$↑     | SDC4   | ¥\$↓     | TLR4  | ¥\$↓      |       |        |       |      |
| BMP15     | COL1A2    | ¥\$↑      | EPHA8     | FOXM3     | IRS1      | ¥↑        | MMP10     | SEMA3C  | ¥\$↑     | SEMA3D | ¥\$↑     | TNF   | ¥\$↑      |       |        |       |      |
| BMP2      | COL2A1    | EPHB1     | ¥\$↓      | FOXO1     | ¥\$↑      | IRS2      | ¥↑        | MMP2    | SERPINH1 | ¥\$↓   | SERPINH1 | ¥\$↓  | TNFRSF11B | ¥\$↑  |        |       |      |
| BMP2K     | COL3A1    | EPHB2     | FOXO3     | IRS4      | ¥\$↓      | ITGA10    | ¥\$↓      | MMP8    | SFRP1    | ¥\$↓   | SFRP1    | ¥\$↓  | TOX       | ¥\$↑  |        |       |      |
| BMP3      | COL4A1    | EPHB3     | FOXO3B    | IRS4      | ¥\$↓      | ITGA11    | ¥\$↑      | MMP9    | SFRP2    | ¥\$↓   | SFRP2    | ¥\$↓  | TUBB3     | ¥\$↓  |        |       |      |
| BMP4      | COL4A2    | EPHB4     | FOXO4     | ¥\$↓      | ITGA12    | ¥\$↓      | ITGA1     | ¥\$↑    | MSX1     | ¥\$↑   | SFRP4    | ¥\$↑  | TUFT1     | ¥\$↓  |        |       |      |
| BMP5      | COL4A3    | EPHB6     | FZD1      | ¥\$↑      | ITGA2     | ¥\$↓      | ITGA2     | ¥\$↓    | MSX2     | ¥\$↑   | SFRP5    | ¥\$↑  | TVST1     | ¥\$↑  |        |       |      |
| BMP6      | ¥\$↑      | COL5A1    | FAM38B    | ¥\$↑      | FZD2      | ¥\$↓      | ITGA2B    | ¥\$↓    | MYOCD    | SHC4   | ¥\$↓     | SFRP5 | ¥\$↑      | VCAM1 | ¥\$↓   |       |      |
| BMP7      | COL5A2    | FBN1      | ¥\$↑      | FZD3      | ¥\$↑      | ITGA3     | ¥\$↓      | NCAM1   | SLC7A2   | ¥\$↑   | SHC4     | ¥\$↓  | VDR       | ¥\$↓  |        |       |      |
| BMP8A     | COL6A3    | FBN2      | ¥\$↑      | FZD4      | ¥\$↑      | ITGA4     | ¥\$↓      | NEDD9   | SMAD1    | ¥\$↓   | SLC7A2   | ¥\$↑  | VEGFA     | ¥\$↑  |        |       |      |
| BMP8B     | COMP      | FBN3      | FZD4      | ¥\$↑      | ITGA5     | ¥\$↓      | ITGA5     | ¥\$↓    | NEFM     | SMAD2  | ¥\$↑     | SMAD1 | ¥\$↓      | VEGFB | ¥\$↑   |       |      |
| BMPER     | ¥\$↑      | CSF2      | FBXO32    | ¥\$↑      | FZD5      | ¥\$↑      | ITGA6     | ¥\$↓    | NELL1    | SMAD3  | ¥\$↓     | SMAD2 | ¥\$↑      | WFS12 | ¥\$↓   |       |      |
| BMPR1A    | ¥\$↑      | CSF3      | FGF1      | ¥\$↓      | FZD6      | ¥\$↑      | ITGA7     | ¥\$↓    | NELL2    | SMAD4  | ¥\$↑     | SMAD3 | ¥\$↓      | WNT1  | ¥\$↑   |       |      |
| BMPR1B    | ¥\$↑      | CTNBN1    | ¥\$↑      | FGF10     | ¥\$↑      | FZD7      | ¥\$↓      | ITGA8   | NFIX     | ¥\$↑   | SMAD4    | ¥\$↑  | SMAD4     | ¥\$↑  | WNT10A | ¥\$↑  |      |
| BMPR2     | ¥\$↑      | CTSK      | ¥\$↑      | FGF11     | ¥\$↑      | FZD8      | ¥\$↑      | ITGA9   | NFKB1    | ¥\$↓   | SMAD5    | ¥\$↑  | SMAD5     | ¥\$↑  | WNT10B | ¥\$↑  |      |
| CALCR     | ¥\$↓      | CXCL12    | FGF12     | ¥\$↑      | FZD9      | ¥\$↑      | ITGA8     | NFKB2   | ¥\$↓     | SMAD6  | ¥\$↑     | SMAD6 | ¥\$↑      | WNT11 | ¥\$↓   |       |      |
| CALCRL    | ¥\$↓      | DKK1      | ¥\$↓      | FGF13     | ¥\$↑      | GCNT4     | ITGAD     | ITGAD   | NLRP1    | ¥\$↑   | SMAD7    | ¥\$↑  | SMAD7     | ¥\$↑  | WNT16  | ¥\$↓  |      |
| CAV2      | ¥\$↓      | DKK2      | ¥\$↓      | FGF14     | ¥\$↑      | GDF10     | ITGAE     | ITGAE   | OGN      | ¥\$↑   | SMAD9    | ¥\$↑  | SMAD9     | ¥\$↑  | WNT2   | ¥\$↑  |      |
| CCNA1     | DKK3      | FGF16     | ¥\$↓      | GFRA1     | ¥↑        | ITGAL     | ¥↓        | ITGAL   | OXTR     | ¥\$↓   | SNAI1    | ¥\$↑  | SNAI1     | ¥\$↑  | WNT2B  | ¥\$↑  |      |
| CCNA2     | ¥\$↓      | DKK4      | FGF17     | GH1       | ITGAM     | pappa     | ¥\$↑      | ITGAM   | OXTR     | ¥\$↓   | SNAI2    | ¥\$↑  | SNAI2     | ¥\$↑  | WNT3   | ¥\$↑  |      |
| CCNB1     | ¥\$↓      | DLL1      | FGF18     | ¥\$↑      | GH2       | ITGAV     | ¥\$↓      | ITGAV   | pappa2   | ¥\$↑   | SNAI3    | ¥\$↑  | SNAI3     | ¥\$↑  | WNT3A  | ¥\$↑  |      |
| CCNB2     | ¥\$↓      | DLX1      | ¥\$↓      | FGF19     | ¥\$↑      | GHDC      | ¥\$↑      | ITGAV   | SP7      | ¥\$↑   | SOX9     | ¥\$↑  | SOX9      | ¥\$↑  | WNT4   | ¥\$↑  |      |
| CCNB3     | ¥\$↓      | DLX2      | ¥\$↓      | FGF2      | ¥\$↑      | GHITM     | ITGB1     | ¥\$↓    | PARD6A   | SP7    | ¥\$↑     | SP7   | ¥\$↑      | SP7   | ¥\$↑   | WNT5A | ¥\$↑ |
| CCNC      | ¥\$↓      | DLX3      | FGF20     | GHR       | ¥\$↑      | GHR       | ITGB2     | ¥\$↓    | PDE1A    | ¥\$↑   | SPARC    | ¥\$↑  | SPARC     | ¥\$↑  | WNT5B  | ¥\$↑  |      |
| CCND1     | ¥\$↓      | DLX4      | FGF21     | ¥\$↓      | GHRH      | ITGB3     | ¥\$↓      | ITGB3   | PDE1B    | ¥\$↑   | SPP1     | ¥\$↑  | SPP1      | ¥\$↑  | WNT6   | ¥\$↑  |      |
| CCND2     | ¥\$↑      | DLX5      | ¥\$↑      | FGF22     | GHRRH     | ITGB3BP   | PDE1C     | ¥\$↑    | PDE1C    | ¥\$↑   | STATH    | ¥\$↑  | STATH     | ¥\$↑  | WNT7A  | ¥\$↑  |      |
| CCND3     | ¥\$↓      | DLX6      | ¥\$↑      | FGF23     | GHRL      | ITGB4     | PDE8B     | ¥\$↑    | PDE8B    | ¥\$↑   | SULT1E1  | ¥\$↑  | SULT1E1   | ¥\$↑  | WNT7B  | ¥\$↑  |      |
| CCNE1     | ¥\$↓      | DMP1      | FGF3      | GLI3      | ¥\$↑      | GLI3      | ITGB5     | ¥\$↑    | PDGFA    | ¥\$↑   | TBX18    | ¥\$↑  | TBX18     | ¥\$↑  | WNT8A  | ¥\$↓  |      |
| CCNE2     | ¥\$↓      | DSG2      | FGF4      | GLIS3     | ¥\$↑      | GLIS3     | ITGB6     | ¥\$↑    | PDGFC    | ¥\$↓   | TCF7     | ¥\$↓  | TCF7      | ¥\$↓  | WNT8B  | ¥\$↓  |      |
| CD36      | DSPP      | FGF5      | ¥\$↓      | GREM2     | ¥\$↑      | GREM2     | ITGB7     | ¥\$↑    | PENK     | ¥\$↑   | TFIP11   | ¥\$↑  | TFIP11    | ¥\$↑  | WNT9A  | ¥\$↑  |      |
| CD44      | ¥\$↓      | EFNA1     | FGF6      | GSK3B     | ¥\$↑      | GSK3B     | ITGB8     | ¥\$↑    | PHEX     | ¥\$↓   | TGFA     | ¥\$↑  | TGFA      | ¥\$↑  | WNT9B  | ¥\$↑  |      |
| CDC2      | ¥\$↓      | EFNA2     | FGF7      | ¥\$↑      | IBSP      | ITGBL1    | ¥\$↑      | ITGB8   | PLA2G5   | ¥\$↓   | TGFB1    | ¥\$↓  | TGFB1     | ¥\$↓  | WWTR1  | ¥\$↑  |      |
| CDH11     | EFNA3     | FGF8      | ICAM1     | ¥\$↓      | JAG1      | PTTG1IP   | ¥\$↓      | ITGBL1  | PRRX2    | ¥\$↓   | TGFB111  | ¥\$↓  | TGFB111   | ¥\$↓  | ZFH4   | ¥\$↑  |      |
|           |           |           |           |           |           |           |           | JAG1    | PTTG1IP  | ¥\$↓   | TGFB2    | ¥\$↓  | TGFB2     | ¥\$↓  |        |       |      |

Alphabetical list of 399 genes of interest chosen a priori for their role in osteoblast development and bone biology. (¥) indicates significant difference in expression levels between 23 cases with the highest levels of *IGF1* expression and 50 unaffected controls. (¥) indicates significant difference in expression levels between 23 cases with the highest levels of *IGF1* expression and 188 affected control cases (e.g. cases with craniosynostosis with low *IGF1* expression). (↑) indicates a the gene is positively correlated with *IGF1* and (↓) indicates that a gene is inversely correlated with *IGF1* for the group(s) it is significant in.
