# Supplementary material for: Calvarial osteoblast gene expression in patients with craniosynostosis leads to novel polygenic mouse model
Source: PubMed Central journal article supplement (PMC6707563; doi:10.1371/journal.pone.0221402), 2019-08-23
Supplement: pone.0221402.s003.pdf [file pone.0221402.s003.pdf]

**S2 Table: Official mouse strain names and abbreviations used in manuscript**

| Jackson Laboratories Official Strain Name    | Abbreviation for Manuscript                                    |
|----------------------------------------------|----------------------------------------------------------------|
| FVB-Tg(Ttr-Igf1)1Sykr/J                      | <i>Igf1</i> <sup>(+/tg)</sup> , <i>Igf1</i> <sup>(tg/tg)</sup> |
| B6.129P2- <i>Gsk3b</i> <sup>tm1Dgen</sup> /J | <i>Gsk3β</i> <sup>(+/-)</sup>                                  |
| C3;B6- <i>Twist1</i> <sup>ska10</sup> /Mmcd  | <i>Twist1</i> <sup>(+/-)</sup>                                 |
