# Supplementary material for: Calvarial osteoblast gene expression in patients with craniosynostosis leads to novel polygenic mouse model
Source: PubMed Central journal article supplement (PMC6707563; doi:10.1371/journal.pone.0221402), 2019-08-23
Supplement: pone.0221402.s004.pdf [file pone.0221402.s004.pdf]

**Supplemental Table 3. Primers used to genotype each mouse strain.**

| <b>Amplicon Gene</b> | <b>Primer Name</b> | <b>Primer Sequence</b>            |
|----------------------|--------------------|-----------------------------------|
| <b>Twist1</b>        | Twist1-F           | 5'-ACGCAGTCGCTGAACGAGG-3'         |
|                      | Twist1-R           | 5'-AGGAGAGTGGAGGGGGATGG-3'        |
| <b>Gsk3b</b>         | Gsk3b-1            | 5'-GGGTGGGATTAGATAAATGCCTGCTCT-3' |
|                      | Gsk3b-2            | 5'-AGGGATATGGTTCGGTAGTTAAGAG-3'   |
|                      | Gsk3b-3            | 5'-GCAAGGTAACCACAGTAGTGGCAAC-3'   |
| <b>Igf1</b>          | Igf1-Wt-F          | 5'-CAAATGTTGCTTGTCTGGTG-3'        |
|                      | Igf1-Wt-R          | 5'-GTCAGTCGAGTGCACAGTTT-3'        |
|                      | Igf1-Tg-F          | 5'-ACCAGAGGGAATTACTATAGC-3'       |
|                      | Igf1-Tg-R          | 5'-TCTCCAGCCTCCTTAGATCAC-3'       |

Primer sequences for *Igf1* and *Gsk3b* sourced from Jackson Laboratories genotyping protocols (jax.org).  
Primers spanning *Twist1* Ser192Pro designed in-house.
